# Supplementary figures and images for: Effects of epoxy resin on ground-granulated blast furnace slag stabilized marine sediments
Source: Royal Society of Chemistry journal article supplement (doi:10.1039/c7ra06460h), 2017-01-01

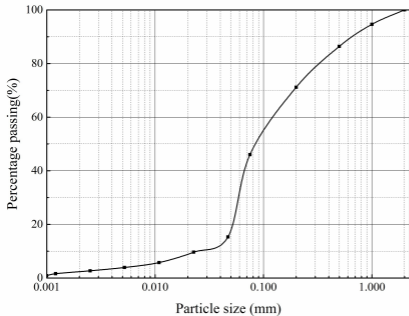

Supplement: c7ra06460h1.pdf [file c7ra06460h1.pdf]
